# Supplementary material for: A theoretical investigation of inositol 1,3,4,5-tetrakisphosphate
Source: Royal Society of Chemistry journal article supplement (doi:10.1039/c0cp00956c), 2010-11-13
Supplement: c0cp00956c.pdf [file c0cp00956c.pdf]

**Supplementary Information****Co-ordinates for the initial Ins(1,3,4,5)P<sub>4</sub> conformation in the PDB file format**

```
HEADER
REMARK  Ins1345P4
HETATM   1  C1           1      0.000  0.000  0.000           C
HETATM   2  O1           1      0.000  0.000  1.430           O
HETATM   3  C2           1      1.452  0.000 -0.513           C
HETATM   4  O2           1      2.126  1.168 -0.037           O
HETATM   5  C3           1      1.452  0.000 -2.053           C
HETATM   6  O3           1      2.800  0.000 -2.530           O
HETATM   7  C4           1      0.726  1.257 -2.567           C
HETATM   8  O4           1      0.726  1.257 -3.997           O
HETATM   9  C5           1     -0.726  1.257 -2.053           C
HETATM  10  O5           1     -1.400  2.425 -2.530           O
HETATM  11  C6           1     -0.726  1.257 -0.513           C
HETATM  12  O6           1     -2.074  1.257 -0.037           O
HETATM  13  P1           1      0.830 -1.437  2.017           P
HETATM  14  O1P         1      0.000 -2.874  1.430           O
HETATM  15  O2P         1      2.489 -1.437  1.430           O
HETATM  16  O3P         1      0.830 -1.437  3.565           O
HETATM  17  P3           1      3.630 -1.437 -1.943           P
HETATM  18  O4P         1      2.773 -2.849 -2.552           O
HETATM  19  O5P         1      3.633 -1.453 -0.395           O
HETATM  20  O6P         1      5.286 -1.435 -2.540           O
HETATM  21  P4           1     -0.104  2.694 -4.583           P
HETATM  22  O7P         1     -0.104  2.694 -6.343           O
HETATM  23  O8P         1     -1.763  2.694 -3.997           O
HETATM  24  O9P         1      0.626  3.959 -4.067           O
HETATM  25  P5           1     -3.059  2.425 -1.943           P
HETATM  26  OPF         1     -3.790  3.690 -2.460           O
HETATM  27  OPG         1     -3.059  2.425 -0.183           O
HETATM  28  OPH         1     -3.889  0.988 -2.530           O
HETATM  29  H1           1     -0.504 -0.874 -0.357           H
HETATM  30  H2           1      1.956 -0.874 -0.157           H
HETATM  31  H3           1      1.673  1.951 -0.357           H
HETATM  32  H4           1      0.948 -0.874 -2.410           H
HETATM  33  H5           1      1.230  2.131 -2.210           H
HETATM  34  H6           1     -1.230  0.384 -2.410           H
HETATM  35  H7           1     -0.222  2.131 -0.157           H
HETATM  36  H8           1     -2.074  1.257  0.923           H
CONNECT   1    2    3   11   29
CONNECT   2    1   13
CONNECT   3    1    4    5   30
CONNECT   4    3   31
CONNECT   5    3    6    7   32
CONNECT   6    5   17
CONNECT   7    5    8    9   33
CONNECT   8    7   21
CONNECT   9    7   10   11  34
CONNECT  10    9   25
CONNECT  11    1    9   12  35
CONNECT  12   11   36
```

Supplementary Material (ESI) for *PCCP*

This journal is © the Owner Societies 2010

|         |    |    |    |    |    |
|---------|----|----|----|----|----|
| CONNECT | 13 | 2  | 14 | 15 | 16 |
| CONNECT | 14 | 13 |    |    |    |
| CONNECT | 15 | 13 |    |    |    |
| CONNECT | 16 | 13 |    |    |    |
| CONNECT | 17 | 6  | 18 | 19 | 20 |
| CONNECT | 18 | 17 |    |    |    |
| CONNECT | 19 | 17 |    |    |    |
| CONNECT | 20 | 17 |    |    |    |
| CONNECT | 21 | 8  | 22 | 23 | 24 |
| CONNECT | 22 | 21 |    |    |    |
| CONNECT | 23 | 21 |    |    |    |
| CONNECT | 24 | 21 |    |    |    |
| CONNECT | 25 | 10 | 26 | 27 | 28 |
| CONNECT | 26 | 25 |    |    |    |
| CONNECT | 27 | 25 |    |    |    |
| CONNECT | 28 | 25 |    |    |    |
| CONNECT | 29 | 1  |    |    |    |
| CONNECT | 30 | 3  |    |    |    |
| CONNECT | 31 | 4  |    |    |    |
| CONNECT | 32 | 5  |    |    |    |
| CONNECT | 33 | 7  |    |    |    |
| CONNECT | 34 | 9  |    |    |    |
| CONNECT | 35 | 11 |    |    |    |
| CONNECT | 36 | 12 |    |    |    |
| END     |    |    |    |    |    |

**Charge parameters and atom-types for the *Ins*(1,3,4,5)*P*<sub>4</sub> isomers optimized using the DFT level of theory in gas phase and in implicit solvent**

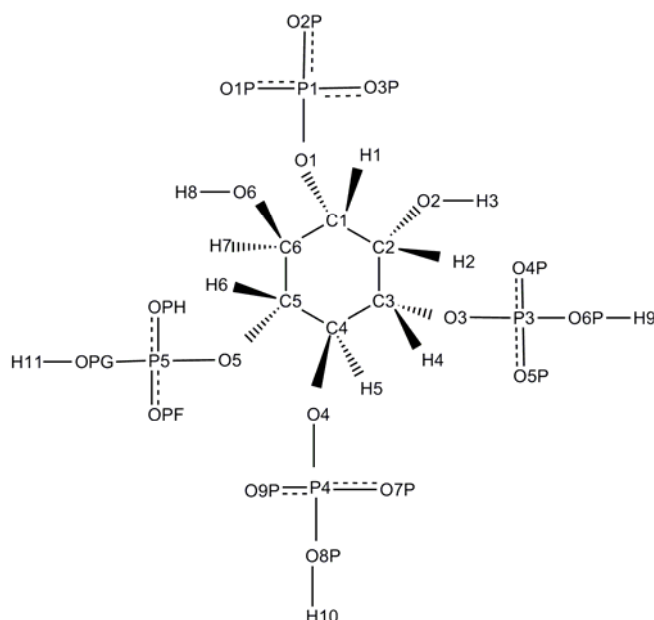

Figure 7: Atomic labelling scheme for the -5 isomer, 1O345H, of *Ins*(1,3,4,5)*P*<sub>4</sub>.

| Atom | ff99SB atom-type | Charge from gas phase calculations | Charge from implicit solvent calculations | Atom | ff99SB atom-type | Charge from gas phase calculations | Charge from implicit solvent calculations |
|------|------------------|------------------------------------|-------------------------------------------|------|------------------|------------------------------------|-------------------------------------------|
| C1   | CT               | 0.064457                           | 0.054532                                  | P4   | P                | 1.259818                           | 1.144515                                  |
| O1   | OS               | -0.440653                          | -0.442010                                 | O7P  | O2               | -0.851880                          | -0.799032                                 |
| C2   | CT               | 0.008829                           | 0.075480                                  | O8P  | OH               | -0.733737                          | -0.753892                                 |
| O2   | OH               | -0.636875                          | -0.645566                                 | O9P  | O2               | -0.823763                          | -0.816634                                 |
| C3   | CT               | 0.029218                           | -0.008141                                 | P5   | P                | 1.206466                           | 1.169697                                  |
| O3   | OS               | -0.431196                          | -0.401554                                 | OPF  | O2               | -0.847562                          | -0.834264                                 |
| C4   | CT               | 0.024091                           | -0.041055                                 | OPG  | OH               | -0.759949                          | -0.728792                                 |
| O4   | OS               | -0.430384                          | -0.390144                                 | OPH  | O2               | -0.827282                          | -0.772197                                 |
| C5   | CT               | 0.002732                           | 0.142454                                  | H1   | HC               | 0.100984                           | 0.101834                                  |
| O5   | OS               | -0.433905                          | -0.431229                                 | H2   | HC               | 0.115432                           | 0.172496                                  |
| C6   | CT               | 0.051170                           | 0.039379                                  | H3   | HO               | 0.398446                           | 0.379911                                  |
| O6   | OH               | -0.646454                          | -0.615011                                 | H4   | HC               | 0.133396                           | 0.134667                                  |
| P1   | P                | 1.221593                           | 1.234204                                  | H5   | HC               | 0.134542                           | 0.170174                                  |
| O1P  | O2               | -0.889876                          | -0.929479                                 | H6   | HC               | 0.145124                           | 0.154687                                  |
| O2P  | O2               | -0.897616                          | -0.918606                                 | H7   | HC               | 0.120302                           | 0.077795                                  |
| O3P  | O2               | -0.914072                          | -0.962883                                 | H8   | HO               | 0.485539                           | 0.378535                                  |
| P3   | P                | 1.250309                           | 1.173772                                  | H9   | HY               | 0.449722                           | 0.462144                                  |
| O4P  | O2               | -0.842832                          | -0.817445                                 | H10  | HY               | 0.427108                           | 0.465369                                  |
| O5P  | O2               | -0.878195                          | -0.854322                                 | H11  | HY               | 0.415118                           | 0.401025                                  |
| O6P  | OH               | -0.758166                          | -0.770411                                 |      |                  |                                    |                                           |

Table VII: Atom names, atom-types and charge parameters for the -5 1O345H isomer of *Ins*(1,3,4,5)*P*<sub>4</sub>. Charge parameters for the 1O345H isomer optimized using the DFT level of theory in both gas phase (Investigation i) and in implicit solvent (Investigation iv), plus assigned atom-types

Supplementary Material (ESI) for *PCCP*

This journal is © the Owner Societies 2010

from the ff99SB force field are provided.

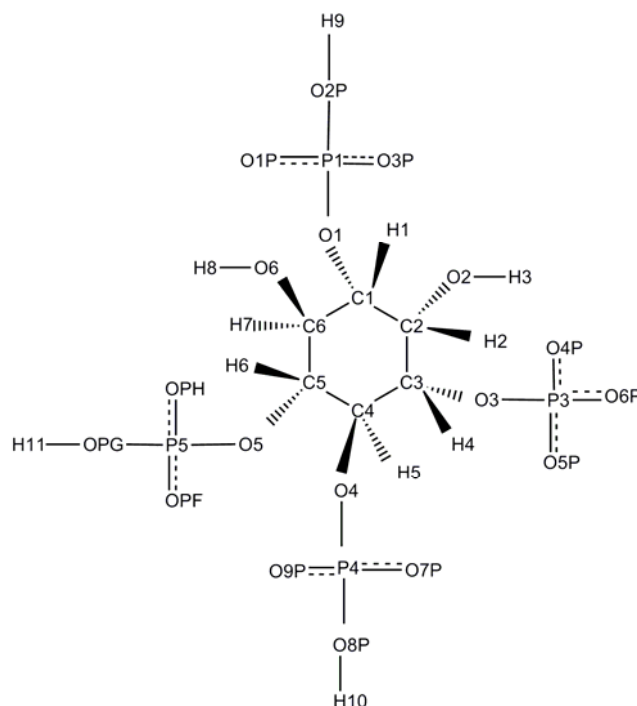
 Figure 8: Atomic labelling scheme for the -5 isomer, 3O145H, of Ins(1,3,4,5)P<sub>4</sub>.

| Atom | ff99SB atom-type | Charge from gas phase calculations | Charge from implicit solvent calculations | Atom | ff99SB atom-type | Charge from gas phase calculations | Charge from implicit solvent calculations |
|------|------------------|------------------------------------|-------------------------------------------|------|------------------|------------------------------------|-------------------------------------------|
| C1   | CT               | 0.025348                           | 0.040405                                  | P4   | P                | 1.188686                           | 1.153536                                  |
| O1   | OS               | -0.439751                          | -0.454266                                 | O7P  | O2               | -0.832640                          | -0.814351                                 |
| C2   | CT               | 0.001280                           | -0.045884                                 | O8P  | OH               | -0.716692                          | -0.803411                                 |
| O2   | OH               | -0.630477                          | -0.638411                                 | O9P  | O2               | -0.827933                          | -0.833242                                 |
| C3   | CT               | 0.024210                           | -0.023493                                 | P5   | P                | 1.171949                           | 1.190142                                  |
| O3   | OS               | -0.377692                          | -0.313868                                 | OPF  | O2               | -0.816340                          | -0.853490                                 |
| C4   | CT               | 0.007595                           | -0.060309                                 | OPG  | OH               | -0.732526                          | -0.744202                                 |
| O4   | OS               | -0.420578                          | -0.394942                                 | OPH  | O2               | -0.817281                          | -0.781105                                 |
| C5   | CT               | 0.037849                           | 0.025379                                  | H1   | HC               | 0.077313                           | 0.108082                                  |
| O5   | OS               | -0.400404                          | -0.409433                                 | H2   | HC               | 0.147599                           | 0.195950                                  |
| C6   | CT               | 0.021890                           | 0.039179                                  | H3   | HO               | 0.405027                           | 0.447829                                  |
| O6   | OH               | -0.540785                          | -0.594231                                 | H4   | HC               | 0.099476                           | 0.099343                                  |
| P1   | P                | 1.182592                           | 1.225168                                  | H5   | HC               | 0.178396                           | 0.209001                                  |
| O1P  | O2               | -0.876489                          | -0.824608                                 | H6   | HC               | 0.143069                           | 0.179736                                  |
| O2P  | OH               | -0.861566                          | -0.722824                                 | H7   | HC               | 0.119300                           | 0.127560                                  |
| O3P  | O2               | -0.909832                          | -0.885626                                 | H8   | HO               | 0.361842                           | 0.358977                                  |
| P3   | P                | 1.224346                           | 1.161603                                  | H9   | HY               | 0.454961                           | 0.411932                                  |
| O4P  | O2               | -0.841628                          | -0.891608                                 | H10  | HY               | 0.396969                           | 0.505050                                  |
| O5P  | O2               | -0.745185                          | -0.890728                                 | H11  | HY               | 0.372774                           | 0.409618                                  |
| O6P  | O2               | -0.854673                          | -0.908457                                 |      |                  |                                    |                                           |

 Table VIII: Atom names, atom-types and charge parameters for the -5 3O145H isomer of Ins(1,3,4,5)P<sub>4</sub>. Charge parameters for the 3O145H isomer optimized using the DFT level of theory in both gas phase (Investigation i) and in implicit solvent (Investigation iv), plus assigned atom-types

Supplementary Material (ESI) for *PCCP*

This journal is © the Owner Societies 2010

from the ff99SB force field are provided.

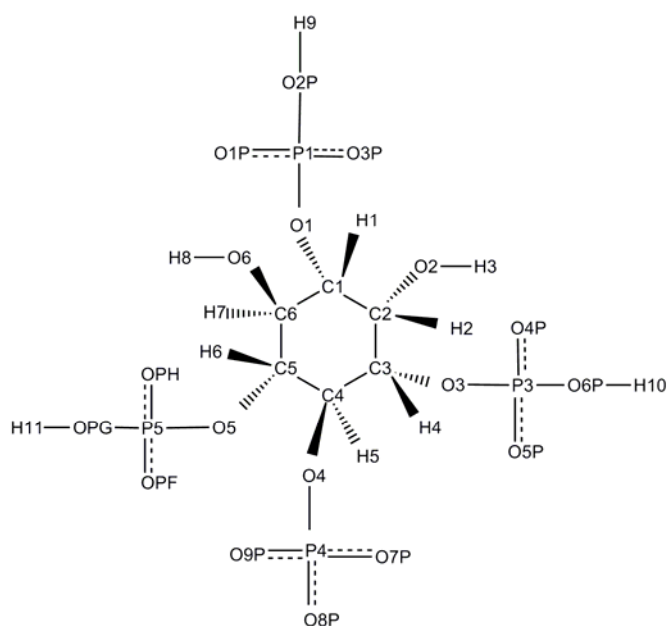

Figure 9: Atomic labelling scheme for the -5 isomer, 4O135H, of Ins(1,3,4,5)P<sub>4</sub>.

| Atom | ff99SB atom-type | Charge from gas phase calculations | Charge from implicit solvent calculations | Atom | ff99SB atom-type | Charge from gas phase calculations | Charge from implicit solvent calculations |
|------|------------------|------------------------------------|-------------------------------------------|------|------------------|------------------------------------|-------------------------------------------|
| C1   | CT               | 0.067152                           | 0.051815                                  | P4   | P                | 1.154384                           | 1.150013                                  |
| O1   | OS               | -0.454090                          | -0.410885                                 | O7P  | O2               | -0.757781                          | -0.790807                                 |
| C2   | CT               | 0.053995                           | -0.003845                                 | O8P  | O2               | -0.830031                          | -0.817402                                 |
| O2   | OH               | -0.600429                          | -0.646364                                 | O9P  | O2               | -0.818263                          | -0.840625                                 |
| C3   | CT               | 0.029898                           | -0.013041                                 | P5   | P                | 1.178274                           | 1.173690                                  |
| O3   | OS               | -0.429845                          | -0.373467                                 | OPF  | O2               | -0.823386                          | -0.818448                                 |
| C4   | CT               | -0.015558                          | 0.001323                                  | OPG  | OH               | -0.737023                          | -0.742525                                 |
| O4   | OS               | -0.388140                          | -0.347744                                 | OPH  | O2               | -0.859649                          | -0.860035                                 |
| C5   | CT               | 0.075115                           | 0.032396                                  | H1   | HC               | 0.101603                           | 0.146168                                  |
| O5   | OS               | -0.450038                          | -0.451589                                 | H2   | HC               | 0.102883                           | 0.134737                                  |
| C6   | CT               | 0.114987                           | 0.057871                                  | H3   | HO               | 0.389414                           | 0.400567                                  |
| O6   | OH               | -0.634800                          | -0.616467                                 | H4   | HC               | 0.112576                           | 0.120579                                  |
| P1   | P                | 1.281418                           | 1.196497                                  | H5   | HC               | 0.150434                           | 0.199870                                  |
| O1P  | O2               | -0.853650                          | -0.824224                                 | H6   | HC               | 0.126104                           | 0.158223                                  |
| O2P  | OH               | -0.745827                          | -0.721426                                 | H7   | HC               | 0.078517                           | 0.091487                                  |
| O3P  | O2               | -0.881105                          | -0.840392                                 | H8   | HO               | 0.383594                           | 0.389899                                  |
| P3   | P                | 1.226401                           | 1.176660                                  | H9   | HY               | 0.392764                           | 0.400132                                  |
| O4P  | O2               | -0.887978                          | -0.891130                                 | H10  | HY               | 0.483249                           | 0.499715                                  |
| O5P  | O2               | -0.916960                          | -0.938514                                 | H11  | HY               | 0.457309                           | 0.440110                                  |
| O6P  | OH               | -0.875517                          | -0.872821                                 |      |                  |                                    |                                           |

Table IX: Atom names, atom-types and charge parameters for the -5 4O135H isomer of Ins(1,3,4,5)P<sub>4</sub>. Charge parameters for the 4O135H isomer optimized using the DFT level of theory in both gas phase (Investigation i) and in implicit solvent (Investigation iv), plus assigned atom-types from the ff99SB force field are provided.

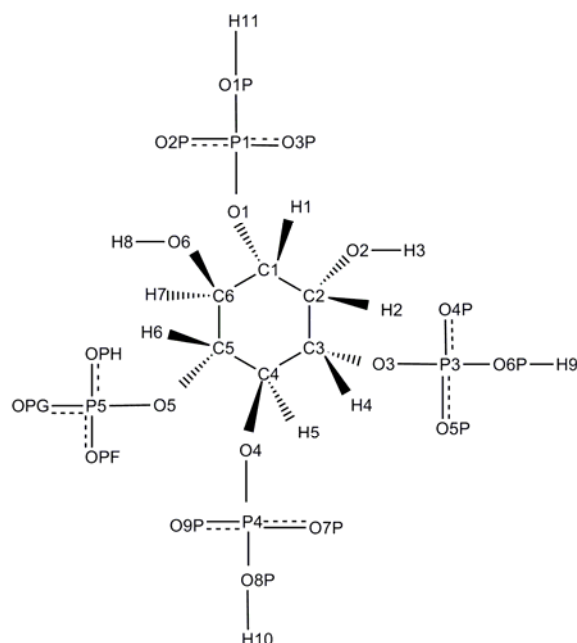

Figure 10: Atomic labelling scheme for the -5 isomer, 5O134H, of Ins(1,3,4,5)P<sub>4</sub>.

| Atom | ff99SB atom-type | Charge from gas phase calculations | Charge from implicit solvent calculations | Atom | ff99SB atom-type | Charge from gas phase calculations | Charge from implicit solvent calculations |
|------|------------------|------------------------------------|-------------------------------------------|------|------------------|------------------------------------|-------------------------------------------|
| C1   | CT               | 0.123260                           | 0.030379                                  | P4   | P                | 1.289614                           | 1.225117                                  |
| O1   | OS               | -0.433811                          | -0.369027                                 | O7P  | O2               | -0.860245                          | -0.859471                                 |
| C2   | CT               | 0.017893                           | -0.010909                                 | O8P  | OH               | -0.762139                          | -0.813132                                 |
| O2   | OH               | -0.647161                          | -0.670600                                 | O9P  | O2               | -0.833095                          | -0.843760                                 |
| C3   | CT               | 0.065885                           | -0.000377                                 | P5   | P                | 1.199519                           | 1.253964                                  |
| O3   | OS               | -0.432741                          | -0.433303                                 | OPF  | O2               | -0.889507                          | -0.901468                                 |
| C4   | CT               | 0.064609                           | -0.036591                                 | OPG  | O2               | -0.873313                          | -0.943645                                 |
| O4   | OS               | -0.465430                          | -0.365711                                 | OPH  | O2               | -0.867124                          | -0.891553                                 |
| C5   | CT               | 0.041720                           | 0.010190                                  | H1   | HC               | 0.086896                           | 0.127909                                  |
| O5   | OS               | -0.457171                          | -0.474075                                 | H2   | HC               | 0.099722                           | 0.136338                                  |
| C6   | CT               | 0.044590                           | 0.164511                                  | H3   | HO               | 0.403981                           | 0.428157                                  |
| O6   | OH               | -0.611761                          | -0.638011                                 | H4   | HC               | 0.112986                           | 0.145792                                  |
| P1   | P                | 1.207331                           | 1.144348                                  | H5   | HC               | 0.104457                           | 0.174036                                  |
| O1P  | O2               | -0.751526                          | -0.728948                                 | H6   | HC               | 0.111057                           | 0.168703                                  |
| O2P  | OH               | -0.849455                          | -0.816686                                 | H7   | HC               | 0.109183                           | 0.090943                                  |
| O3P  | O2               | -0.868837                          | -0.825319                                 | H8   | HO               | 0.434557                           | 0.390874                                  |
| P3   | P                | 1.240632                           | 1.190137                                  | H9   | HY               | 0.435962                           | 0.440265                                  |
| O4P  | O2               | -0.844004                          | -0.818523                                 | H10  | HY               | 0.465059                           | 0.524241                                  |
| O5P  | O2               | -0.879797                          | -0.883693                                 | H11  | HY               | 0.411683                           | 0.419305                                  |
| O6P  | OH               | -0.743478                          | -0.740407                                 |      |                  |                                    |                                           |

Table X: Atom names, atom-types and charge parameters for the -5 5O134H isomer of Ins(1,3,4,5)P<sub>4</sub>. Charge parameters for the 5O134H isomer optimized using the DFT level of theory in both gas phase (Investigation i) and in implicit solvent (Investigation iv), plus assigned atom-types from the ff99SB force field are provided.

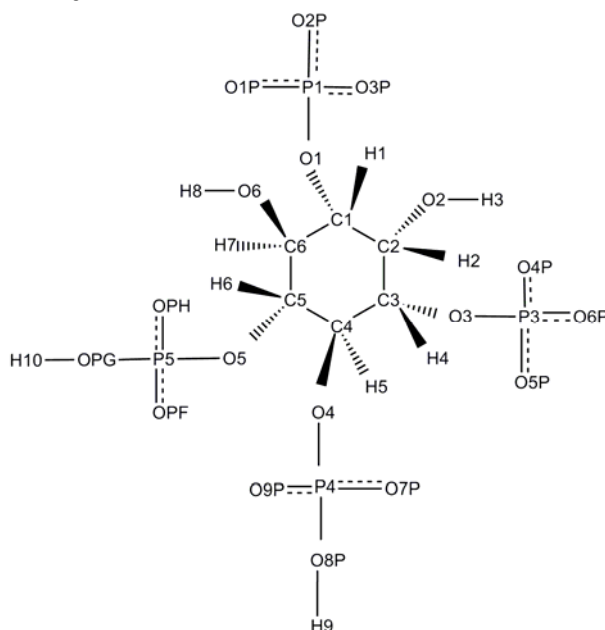

Figure 11: Atomic labelling scheme for the -6 isomer, 13O45H.

| Atom | ff99SB atom-type | Charge from gas phase calculations | Charge from implicit solvent calculations | Atom | ff99SB atom-type | Charge from gas phase calculations | Charge from implicit solvent calculations |
|------|------------------|------------------------------------|-------------------------------------------|------|------------------|------------------------------------|-------------------------------------------|
| C1   | CT               | 0.093766                           | 0.040495                                  | P4   | P                | 1.196060                           | 1.179730                                  |
| O1   | OS               | -0.439348                          | -0.447475                                 | O7P  | O2               | -0.886377                          | -0.839367                                 |
| C2   | CT               | 0.007139                           | -0.013715                                 | O8P  | OH               | -0.796951                          | -0.818506                                 |
| O2   | OH               | -0.714736                          | -0.659133                                 | O9P  | O2               | -0.843762                          | -0.847359                                 |
| C3   | CT               | 0.146969                           | 0.016601                                  | P5   | P                | 1.211750                           | 1.229935                                  |
| O3   | OS               | -0.477680                          | -0.354787                                 | OPF  | O2               | -0.913455                          | -0.880024                                 |
| C4   | CT               | 0.270887                           | -0.010149                                 | OPG  | OH               | -0.898445                          | -0.776595                                 |
| O4   | OS               | -0.514047                          | -0.383884                                 | OPH  | O2               | -0.892259                          | -0.837850                                 |
| C5   | CT               | 0.096798                           | -0.012868                                 | H1   | HC               | 0.089053                           | 0.119010                                  |
| O5   | OS               | -0.505482                          | -0.417740                                 | H2   | HC               | 0.113146                           | 0.185572                                  |
| C6   | CT               | 0.064200                           | 0.151191                                  | H3   | HO               | 0.478171                           | 0.379343                                  |
| O6   | OH               | -0.594670                          | -0.758614                                 | H4   | HC               | 0.014214                           | 0.107768                                  |
| P1   | P                | 1.227467                           | 1.212175                                  | H5   | HC               | 0.067743                           | 0.159592                                  |
| O1P  | O2               | -0.753984                          | -0.930290                                 | H6   | HC               | 0.063116                           | 0.132246                                  |
| O2P  | O2               | -0.869403                          | -0.909614                                 | H7   | HC               | 0.115468                           | 0.098671                                  |
| O3P  | O2               | -0.896858                          | -0.945028                                 | H8   | HO               | 0.373761                           | 0.511653                                  |
| P3   | P                | 1.207054                           | 1.181518                                  | H9   | HY               | 0.508429                           | 0.489190                                  |
| O4P  | O2               | -0.910409                          | -0.906625                                 | H10  | HY               | 0.427991                           | 0.455627                                  |
| O5P  | O2               | -0.927561                          | -0.948150                                 |      |                  |                                    |                                           |
| O6P  | O2               | -0.937756                          | -0.952542                                 |      |                  |                                    |                                           |

Table XI: Atom names, atom-types and charge parameters for the -6 13O45H isomer of  $\text{Ins}(1,3,4,5)\text{P}_4$ . Charge parameters for the 13O45H isomer optimized using the DFT level of theory in both gas phase (Investigation i) and in implicit solvent (Investigation iv), plus assigned atom-types from the ff99SB force field are provided.

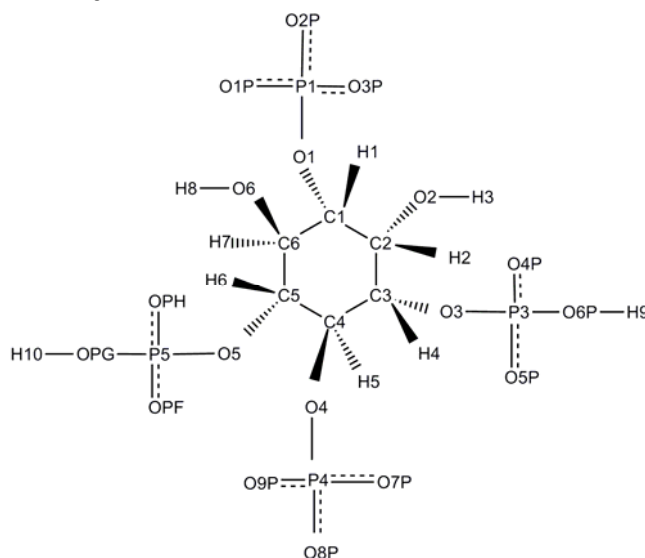

Figure 12: Atomic labelling scheme for the -6 isomer, 14O35H, of Ins(1,3,4,5)P<sub>4</sub>.

| Atom | ff99SB atom-type | Charge from gas phase calculations | Charge from implicit solvent calculations | Atom | ff99SB atom-type | Charge from gas phase calculations | Charge from implicit solvent calculations |
|------|------------------|------------------------------------|-------------------------------------------|------|------------------|------------------------------------|-------------------------------------------|
| C1   | CT               | 0.087105                           | 0.075569                                  | P4   | P                | 1.197861                           | 1.167154                                  |
| O1   | OS               | -0.488174                          | -0.440517                                 | O7P  | O2               | -0.937085                          | -0.953144                                 |
| C2   | CT               | -0.090218                          | 0.003380                                  | O8P  | O2               | -0.934105                          | -0.883026                                 |
| O2   | OH               | -0.563806                          | -0.660393                                 | O9P  | O2               | -0.905005                          | -0.904629                                 |
| C3   | CT               | 0.083548                           | -0.025403                                 | P5   | P                | 1.224824                           | 1.276294                                  |
| O3   | OS               | -0.491981                          | -0.394165                                 | OPF  | O2               | -0.853650                          | -0.870950                                 |
| C4   | CT               | 0.447407                           | -0.009118                                 | OPG  | OH               | -0.729417                          | -0.835885                                 |
| O4   | OS               | -0.569679                          | -0.358995                                 | OPH  | O2               | -0.834759                          | -0.859487                                 |
| C5   | CT               | 0.027745                           | -0.011861                                 | H1   | HC               | 0.111064                           | 0.117419                                  |
| O5   | OS               | -0.505153                          | -0.404841                                 | H2   | HC               | 0.162411                           | 0.103312                                  |
| C6   | CT               | 0.055585                           | 0.054656                                  | H3   | HO               | 0.378460                           | 0.403045                                  |
| O6   | OH               | -0.740504                          | -0.665474                                 | H4   | HC               | 0.091560                           | 0.140208                                  |
| P1   | P                | 1.223743                           | 1.224003                                  | H5   | HC               | 0.013005                           | 0.181653                                  |
| O1P  | O2               | -0.918376                          | -0.929374                                 | H6   | HC               | 0.189342                           | 0.153761                                  |
| O2P  | O2               | -0.921389                          | -0.919832                                 | H7   | HC               | 0.130156                           | 0.103834                                  |
| O3P  | O2               | -0.946172                          | -0.951468                                 | H8   | HO               | 0.498909                           | 0.484436                                  |
| P3   | P                | 1.281248                           | 1.171237                                  | H9   | HY               | 0.393041                           | 0.552291                                  |
| O4P  | O2               | -0.889496                          | -0.847431                                 | H10  | HY               | 0.361793                           | 0.433667                                  |
| O5P  | O2               | -0.865293                          | -0.901082                                 |      |                  |                                    |                                           |
| O6P  | OH               | -0.774545                          | -0.818844                                 |      |                  |                                    |                                           |

Table XII: Atom names, atom-types and charge parameters for the -6 14O35H isomer of Ins(1,3,4,5)P<sub>4</sub>. Charge parameters for the 14O35H isomer optimized using the DFT level of theory in both gas phase (Investigation i) and in implicit solvent (Investigation iv), plus assigned atom-types from the ff99SB force field are provided.



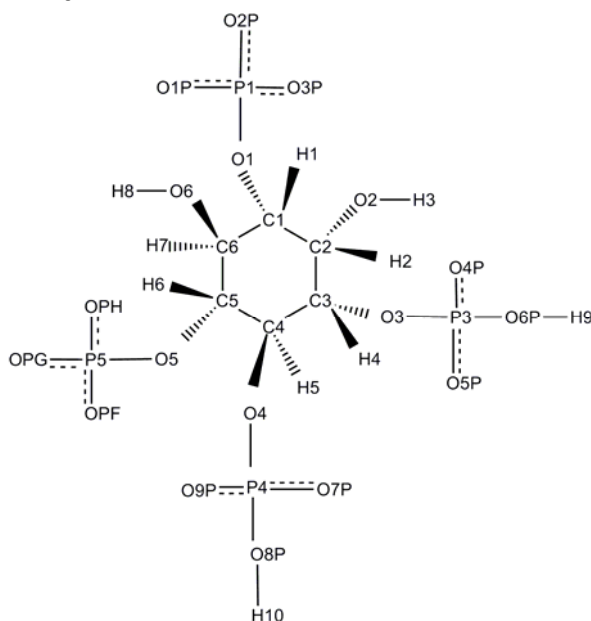

Figure 13: Atomic labelling scheme for the -6 isomer, 15O34H, of Ins(1,3,4,5)P<sub>4</sub>.

| Atom | ff99SB atom-type | Charge from gas phase calculations | Charge from implicit solvent calculations | Atom | ff99SB atom-type | Charge from gas phase calculations | Charge from implicit solvent calculations |
|------|------------------|------------------------------------|-------------------------------------------|------|------------------|------------------------------------|-------------------------------------------|
| C1   | CT               | 0.089395                           | 0.039687                                  | P4   | P                | 1.248110                           | 1.163037                                  |
| O1   | OS               | -0.454519                          | -0.442716                                 | O7P  | O2               | -0.891912                          | -0.894236                                 |
| C2   | CT               | 0.030986                           | 0.075062                                  | O8P  | OH               | -0.858599                          | -0.893942                                 |
| O2   | OH               | -0.675099                          | -0.647495                                 | O9P  | O2               | -0.808412                          | -0.885952                                 |
| C3   | CT               | 0.016353                           | 0.003448                                  | P5   | P                | 1.264643                           | 1.185748                                  |
| O3   | OS               | -0.452271                          | -0.385701                                 | OPF  | O2               | -0.895760                          | -0.893543                                 |
| C4   | CT               | -0.010827                          | -0.055839                                 | OPG  | O2               | -0.854938                          | -0.849694                                 |
| O4   | OS               | -0.429786                          | -0.373607                                 | OPH  | O2               | -0.820396                          | -0.809694                                 |
| C5   | CT               | 0.044297                           | 0.080212                                  | H1   | HC               | 0.075113                           | 0.110071                                  |
| O5   | OS               | -0.479894                          | -0.414721                                 | H2   | HC               | 0.110894                           | 0.148078                                  |
| C6   | CT               | 0.164636                           | 0.095682                                  | H3   | HO               | 0.408913                           | 0.365325                                  |
| O6   | OH               | -0.669131                          | -0.641789                                 | H4   | HC               | 0.118709                           | 0.122794                                  |
| P1   | P                | 1.204602                           | 1.208052                                  | H5   | HC               | 0.156571                           | 0.171731                                  |
| O1P  | O2               | -0.915012                          | -0.928502                                 | H6   | HC               | 0.139567                           | 0.156188                                  |
| O2P  | O2               | -0.921008                          | -0.923910                                 | H7   | HC               | 0.072588                           | 0.062780                                  |
| O3P  | O2               | -0.950000                          | -0.971553                                 | H8   | HO               | 0.432633                           | 0.379792                                  |
| P3   | P                | 1.242163                           | 1.182467                                  | H9   | HY               | 0.528178                           | 0.498913                                  |
| O4P  | O2               | -0.903789                          | -0.839136                                 | H10  | HY               | 0.496733                           | 0.501294                                  |
| O5P  | O2               | -0.944388                          | -0.898412                                 |      |                  |                                    |                                           |
| O6P  | OH               | -0.909340                          | -0.799919                                 |      |                  |                                    |                                           |

Table XIII: Atom names, atom-types and charge parameters for the -6 15O34H isomer of Ins(1,3,4,5)P<sub>4</sub>. Charge parameters for the 15O34H isomer optimized using the DFT level of theory in both gas phase (Investigation i) and in implicit solvent (Investigation iv), plus assigned atom-types from the ff99SB force field are provided.

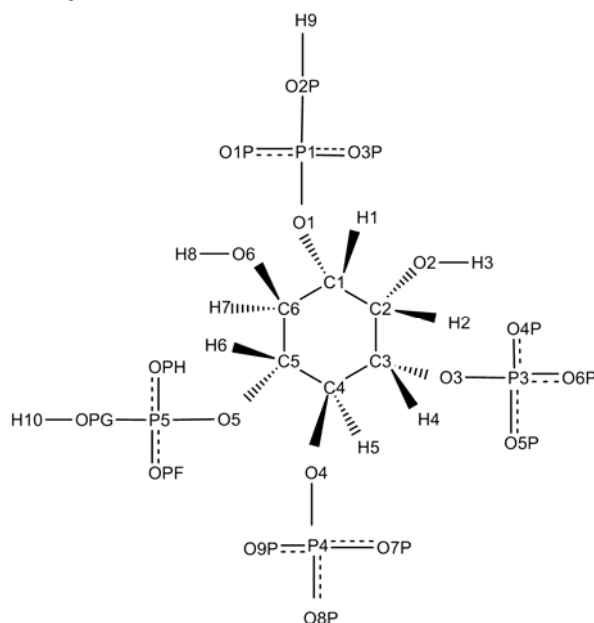Figure 14: Atomic labelling scheme for the -6 isomer, 34O15H, of Ins(1,3,4,5)P<sub>4</sub>.

| Atom | ff99SB atom-type | Charge from gas phase calculations | Charge from implicit solvent calculations | Atom | ff99SB atom-type | Charge from gas phase calculations | Charge from implicit solvent calculations |
|------|------------------|------------------------------------|-------------------------------------------|------|------------------|------------------------------------|-------------------------------------------|
| C1   | CT               | 0.350123                           | 0.099150                                  | P4   | P                | 1.207097                           | 1.110517                                  |
| O1   | OS               | -0.541851                          | -0.446383                                 | O7P  | O2               | -0.960478                          | -0.928569                                 |
| C2   | CT               | -0.048199                          | -0.055548                                 | O8P  | O2               | -0.930105                          | -0.931171                                 |
| O2   | OH               | -0.699230                          | -0.650742                                 | O9P  | O2               | -0.929292                          | -0.899224                                 |
| C3   | CT               | 0.147357                           | -0.058333                                 | P5   | P                | 1.236009                           | 1.195312                                  |
| O3   | OS               | -0.517592                          | -0.228796                                 | OPF  | O2               | -0.888834                          | -0.799040                                 |
| C4   | CT               | 0.129352                           | -0.075570                                 | OPG  | OH               | -0.752439                          | -0.798958                                 |
| O4   | OS               | -0.524221                          | -0.393788                                 | OPH  | O2               | -0.873743                          | -0.871376                                 |
| C5   | CT               | 0.144544                           | 0.024916                                  | H1   | HC               | 0.065585                           | 0.091548                                  |
| O5   | OS               | -0.512323                          | -0.330904                                 | H2   | HC               | 0.178981                           | 0.196624                                  |
| C6   | CT               | 0.139986                           | 0.076243                                  | H3   | HO               | 0.481607                           | 0.451336                                  |
| O6   | OH               | -0.774836                          | -0.712871                                 | H4   | HC               | 0.038017                           | 0.068087                                  |
| P1   | P                | 1.196935                           | 1.210523                                  | H5   | HC               | 0.091567                           | 0.180668                                  |
| O1P  | O2               | -0.866932                          | -0.841187                                 | H6   | HC               | 0.166122                           | 0.141642                                  |
| O2P  | OH               | -0.742956                          | -0.730391                                 | H7   | HC               | 0.086199                           | 0.150563                                  |
| O3P  | O2               | -0.891659                          | -0.900761                                 | H8   | HO               | 0.445868                           | 0.428784                                  |
| P3   | P                | 1.211382                           | 1.110367                                  | H9   | HY               | 0.434454                           | 0.405697                                  |
| O4P  | O2               | -0.925456                          | -0.897580                                 | H10  | HY               | 0.417632                           | 0.423909                                  |
| O5P  | O2               | -0.873079                          | -0.900964                                 |      |                  |                                    |                                           |
| O6P  | O2               | -0.915592                          | -0.913733                                 |      |                  |                                    |                                           |

Table XIV: Atom names, atom-types and charge parameters for the -6 34O15H isomer of Ins(1,3,4,5)P<sub>4</sub>. Charge parameters for the 34O15H isomer optimized using the DFT level of theory in both gas phase (Investigation i) and in implicit solvent (Investigation iv), plus assigned atom-types from the ff99SB force field are provided.

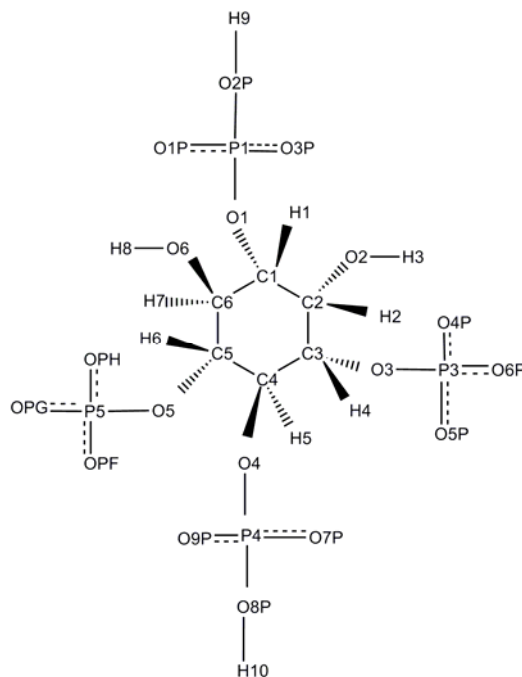

Figure 15: Atomic labelling scheme for the -6 isomer, 35O14H, of Ins(1,3,4,5)P<sub>4</sub>.

| Atom | ff99SB atom-type | Charge from gas phase calculations | Charge from implicit solvent calculations | Atom | ff99SB atom-type | Charge from gas phase calculations | Charge from implicit solvent calculations |
|------|------------------|------------------------------------|-------------------------------------------|------|------------------|------------------------------------|-------------------------------------------|
| C1   | CT               | 0.088364                           | 0.049933                                  | P4   | P                | 1.117351                           | 1.160362                                  |
| O1   | OS               | -0.572709                          | -0.453692                                 | O7P  | O2               | -0.873062                          | -0.867087                                 |
| C2   | CT               | 0.073581                           | -0.031240                                 | O8P  | OH               | -0.718967                          | -0.841467                                 |
| O2   | OH               | -0.568190                          | -0.654825                                 | O9P  | O2               | -0.864282                          | -0.854695                                 |
| C3   | CT               | 0.079954                           | -0.014676                                 | P5   | P                | 1.139709                           | 1.223066                                  |
| O3   | OS               | -0.500754                          | -0.314370                                 | OPF  | O2               | -0.910238                          | -0.952007                                 |
| C4   | CT               | 0.374932                           | -0.051223                                 | OPG  | O2               | -0.906820                          | -0.915439                                 |
| O4   | OS               | -0.498680                          | -0.390097                                 | OPH  | O2               | -0.860828                          | -0.935988                                 |
| C5   | CT               | 0.004386                           | 0.025184                                  | H1   | HC               | 0.090050                           | 0.100207                                  |
| O5   | OS               | -0.419084                          | -0.415170                                 | H2   | HC               | 0.169918                           | 0.186514                                  |
| C6   | CT               | 0.128681                           | 0.061959                                  | H3   | HO               | 0.299892                           | 0.455247                                  |
| O6   | OH               | -0.743417                          | -0.603328                                 | H4   | HC               | 0.035168                           | 0.088403                                  |
| P1   | P                | 1.299104                           | 1.220359                                  | H5   | HC               | 0.037156                           | 0.189261                                  |
| O1P  | O2               | -0.896096                          | -0.836482                                 | H6   | HC               | 0.200170                           | 0.168737                                  |
| O2P  | OH               | -0.741868                          | -0.738611                                 | H7   | HC               | 0.104527                           | 0.108312                                  |
| O3P  | O2               | -0.876369                          | -0.898820                                 | H8   | HO               | 0.456439                           | 0.346962                                  |
| P3   | P                | 1.194056                           | 1.153175                                  | H9   | HY               | 0.407503                           | 0.415917                                  |
| O4P  | O2               | -0.916010                          | -0.902317                                 | H10  | HY               | 0.437918                           | 0.547294                                  |
| O5P  | O2               | -0.930820                          | -0.907670                                 |      |                  |                                    |                                           |
| O6P  | O2               | -0.940664                          | -0.921685                                 |      |                  |                                    |                                           |

Table XV: Atom names, atom-types and charge parameters for the -6 35O14H isomer of Ins(1,3,4,5)P<sub>4</sub>. Charge parameters for the 35O14H isomer optimized using the DFT level of theory in both gas phase (Investigation i) and in implicit solvent (Investigation iv), plus assigned atom-types from the ff99SB force field are provided.

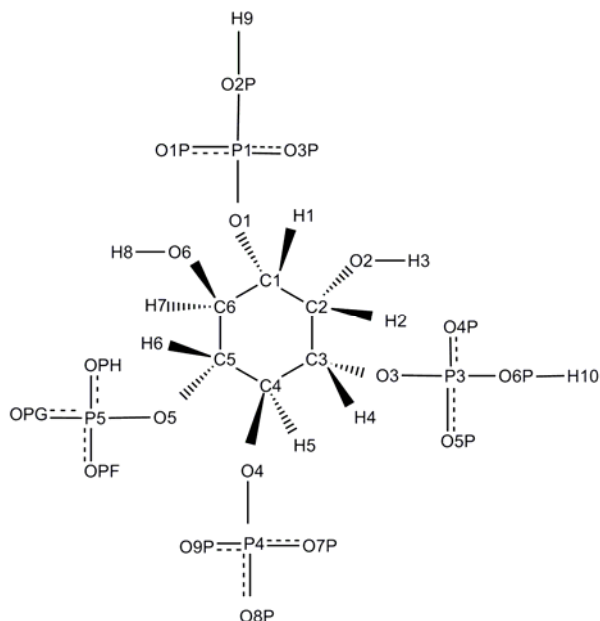

Figure 16: Atomic labelling scheme for the -6 isomer, 45O13H, of Ins(1,3,4,5)P<sub>4</sub>.

| Atom | ff99SB atom-type | Charge from gas phase calculations | Charge from implicit solvent calculations | Atom | ff99SB atom-type | Charge from gas phase calculations | Charge from implicit solvent calculations |
|------|------------------|------------------------------------|-------------------------------------------|------|------------------|------------------------------------|-------------------------------------------|
| C1   | CT               | 0.093976                           | 0.040394                                  | P4   | P                | 1.232417                           | 1.235426                                  |
| O1   | OS               | -0.469224                          | -0.369916                                 | O7P  | O2               | -0.899018                          | -0.855161                                 |
| C2   | CT               | 0.039703                           | -0.001886                                 | O8P  | O2               | -0.859343                          | -0.868003                                 |
| O2   | OH               | -0.672906                          | -0.662217                                 | O9P  | O2               | -0.791452                          | -0.872161                                 |
| C3   | CT               | 0.030880                           | -0.046226                                 | P5   | P                | 1.183591                           | 1.138666                                  |
| O3   | OS               | -0.471469                          | -0.395765                                 | OPF  | O2               | -0.924377                          | -0.894970                                 |
| C4   | CT               | 0.234846                           | -0.022232                                 | OPG  | O2               | -0.887561                          | -0.974276                                 |
| O4   | OS               | -0.552305                          | -0.383125                                 | OPH  | O2               | -0.919193                          | -0.911625                                 |
| C5   | CT               | 0.312545                           | 0.072067                                  | H1   | HC               | 0.123491                           | 0.138234                                  |
| O5   | OS               | -0.545313                          | -0.402341                                 | H2   | HC               | 0.222211                           | 0.153541                                  |
| C6   | CT               | 0.052825                           | 0.045002                                  | H3   | HO               | 0.356090                           | 0.409705                                  |
| O6   | OH               | -0.718797                          | -0.563247                                 | H4   | HC               | 0.072579                           | 0.127197                                  |
| P1   | P                | 1.210851                           | 1.179642                                  | H5   | HC               | 0.060597                           | 0.167795                                  |
| O1P  | O2               | -0.858163                          | -0.837686                                 | H6   | HC               | 0.034403                           | 0.145398                                  |
| O2P  | OH               | -0.744083                          | -0.731502                                 | H7   | HC               | 0.120220                           | 0.085253                                  |
| O3P  | O2               | -0.884459                          | -0.859626                                 | H8   | HO               | 0.422779                           | 0.331953                                  |
| P3   | P                | 1.188794                           | 1.193307                                  | H9   | HY               | 0.422007                           | 0.414980                                  |
| O4P  | O2               | -0.888018                          | -0.920389                                 | H10  | HY               | 0.505325                           | 0.526224                                  |
| O5P  | O2               | -0.928440                          | -0.936265                                 |      |                  |                                    |                                           |
| O6P  | OH               | -0.906012                          | -0.896165                                 |      |                  |                                    |                                           |

Table XVI: Atom names, atom-types and charge parameters for the -6 45O13H isomer of Ins(1,3,4,5)P<sub>4</sub>. Charge parameters for the 45O13H isomer optimized using the DFT level of theory in both gas phase (Investigation i) and in implicit solvent (Investigation iv), plus assigned atom-types from the ff99SB force field are provided.

**Absolute energy values**

| Method                                                                         | Charge of isomer | Isomer | Absolute energy                 |
|--------------------------------------------------------------------------------|------------------|--------|---------------------------------|
| QM geometry optimization using DFT level of theory in gas phase                | -4               | 1345H  | -2955.51054203 Hartree          |
|                                                                                | -5               | 5O134H | -2954.58116343 Hartree          |
|                                                                                | -6               | 13O45H | -2953.52631124 Hartree          |
| MM energy minimization in gas phase, with ff99SB atom types                    | -4               | 1345H  | -11.0011 kcal mol <sup>-1</sup> |
|                                                                                | -5               | 5O134H | 2.38092 kcal mol <sup>-1</sup>  |
|                                                                                | -6               | 13O45H | 20.4906 kcal mol <sup>-1</sup>  |
| QM geometry optimization using MP2 level of theory in gas phase                | -4               | 1345H  | -2944.74699756 Hartree          |
|                                                                                | -5               | 1O345H | -2943.81328454 Hartree          |
|                                                                                | -6               | 13O45H | -2942.76737024 Hartree          |
| MM energy minimization in gas phase, with GAFF atom types                      | -4               | 1345H  | 3.4857 kcal mol <sup>-1</sup>   |
|                                                                                | -5               | 4O135H | 12.8553 kcal mol <sup>-1</sup>  |
|                                                                                | -6               | 45O13H | 25.3140 kcal mol <sup>-1</sup>  |
| QM geometry optimization using DFT level of theory in a solvent reaction field | -4               | 1345H  | -2956.29182024 Hartree          |
|                                                                                | -5               | 4O135H | -2955.78091556 Hartree          |
|                                                                                | -6               | 15O34H | -2955.27682553 Hartree          |
| MM energy minimization in implicit solvent                                     | -4               | 1345H  | -705.72 kcal mol <sup>-1</sup>  |
|                                                                                | -5               | 5O134H | -803.51 kcal mol <sup>-1</sup>  |
|                                                                                | -6               | 14O35H | -904.07 kcal mol <sup>-1</sup>  |

Table XVII: The absolute energies for the lowest energy isomers, of each charge subset, for each method. Exact digits are given to facilitate the exact reproduction of the calculation.
